# Supplementary material for: Perirenal fat stranding as a predictor of disease progression after radical nephroureterectomy for renal pelvic urothelial carcinoma: a retrospective study
Source: PubMed Central journal article supplement (PMC10317934; doi:10.1007/s12672-023-00741-z), 2023-07-03

**Supplementally Figure 1.** Patient selection flowchart of pathological analysis

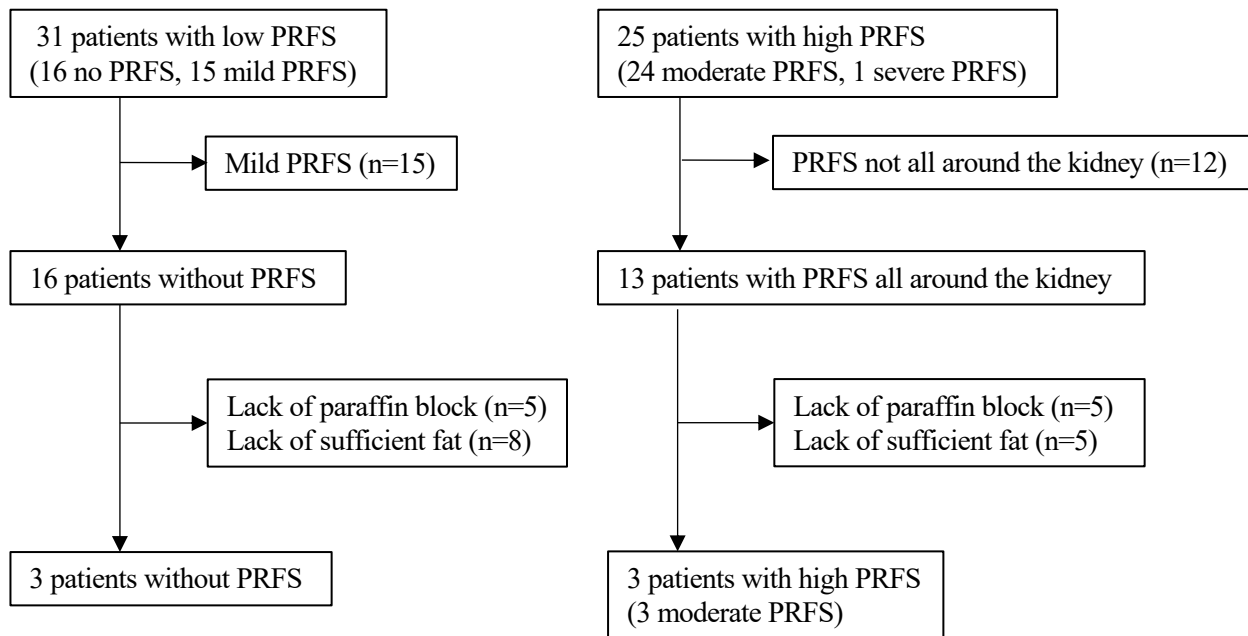

Supplement: 12672_2023_741_MOESM1_ESM.pdf [file 12672_2023_741_MOESM1_ESM.pdf]
