# Supplementary material for: Perirenal fat stranding as a predictor of disease progression after radical nephroureterectomy for renal pelvic urothelial carcinoma: a retrospective study
Source: PubMed Central journal article supplement (PMC10317934; doi:10.1007/s12672-023-00741-z), 2023-07-03
Supplement: 12672_2023_741_MOESM3_ESM.pdf [file 12672_2023_741_MOESM3_ESM.pdf]

**Supplementary Table 1.** Antibodies and staining conditions used in this study

| Antibody | Animal | Clonality  | Clone | Dilution | Antigen retrieval                             | Vendor                                          |
|----------|--------|------------|-------|----------|-----------------------------------------------|-------------------------------------------------|
| CD68     | Mouse  | Monoclonal | KP-1  | 1:500    | CB (pH 6); heating in an autoclave for 20 min | DAKO, Santa Clara, CA, USA                      |
| CD163    | Mouse  | Monoclonal | 10D6  | 1:100    | CB (pH 6); heating in an autoclave for 20 min | Novocastra, Leica Biosystems, Nussloch, Germany |
| CD3      | Rabbit | Polyclonal |       | 1:500    | CB (pH 6); heating in an autoclave for 20 min | DAKO, Santa Clara, CA, USA                      |
| CD20     | Mouse  | Monoclonal | L26   | 1:1000   | CB (pH 6); heating in an autoclave for 20 min | DAKO, Santa Clara, CA, USA                      |
